# Supplementary material for: CRISPR/Cas9-mediated targeted mutagenesis in grape
Source: PubMed Central journal article supplement (PMC5436839; doi:10.1371/journal.pone.0177966), 2017-05-18
Supplement: pone.0177966.s002.pdf [file pone.0177966.s002.pdf]

## S2 Fig

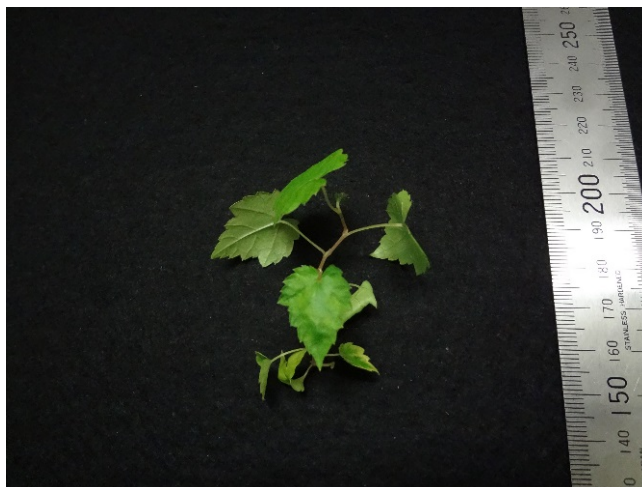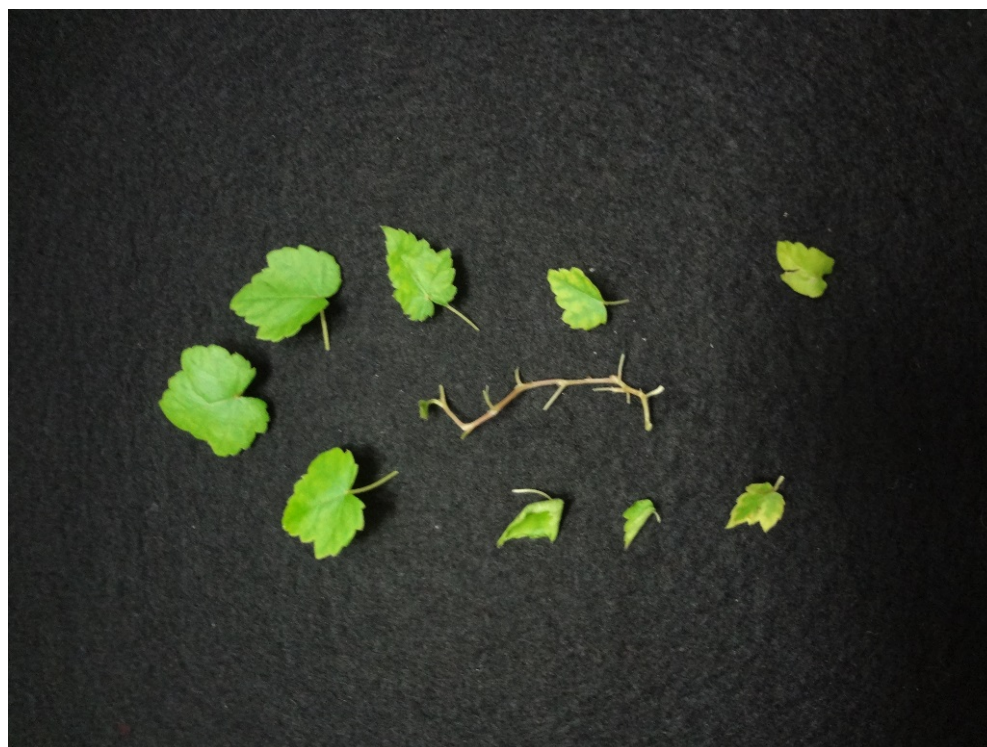

**S2 Fig. Regenerated plants of non-transformed 'Neo Muscat'.**  
Bleached areas are less wide in leaves.
