# Supplementary material for: CRISPR/Cas9-mediated targeted mutagenesis in grape
Source: PubMed Central journal article supplement (PMC5436839; doi:10.1371/journal.pone.0177966), 2017-05-18
Supplement: pone.0177966.s004.pdf [file pone.0177966.s004.pdf]

## S4 Fig

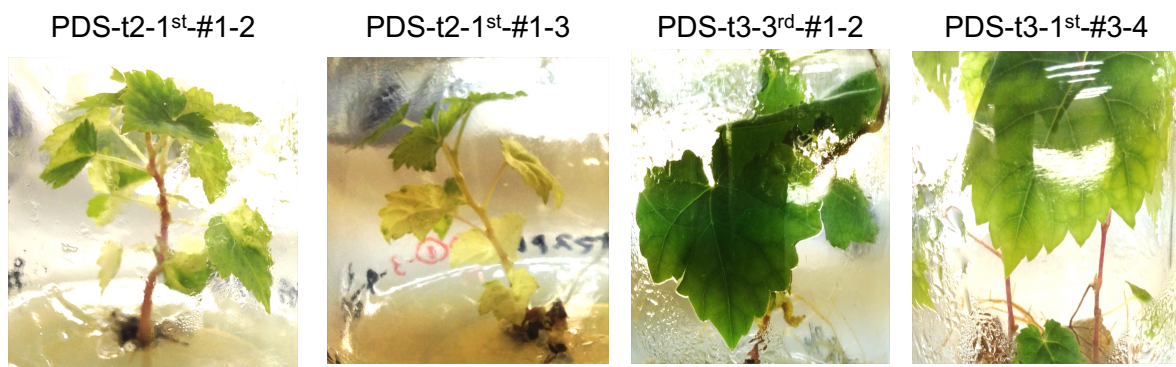

**S4 Fig. Appearance of regenerated plants used for Western blot analysis.**

Bleaching or pale green cells were dominant in three regenerated plants (PDS-t2-1<sup>st</sup>-#1-2, 3 and PDS-t3-1<sup>st</sup>-#3-4). On the other hand, leaf color of PDS-t3-3<sup>rd</sup>-#1-2 is almost the same as that of wild-type, 'Neo Muscat' (S2 Fig.).
